# Supplementary material for: Lumbar spine bone mineral adaptation: cricket fast bowlers versus controls
Source: HighWire-hosted journal article supplement (doi:10.1136/bmjsem-2022-001481), 2023-04-01
Supplement: bmjsem-2022-001481supp001_data_supplement.xlsx [file bmjsem-2022-001481supp001_data_supplement.xlsx]

## Sheet: Sheet1
			L1-L4 BMD							IL3 BMD							CL3 BMD							IL4 BMD							CL4 BMD							L1-L4 BMC							IL3 BMC
Level 1 (Age) Q-Q Plot
Level 2 (ID) Q-Q Plot
Level 1 Residuals
Level 2 Residuals
